# Supplementary material for: Loneliness Is Associated with Depressive Affect, But Not with Most Other Symptoms of Depression in Community-Dwelling Individuals: A Network Analysis
Source: MDPI journal article supplement (doi:10.3390/ijerph18052408), 2021-03-01
Supplement: s1 [file s1]

**Table S1.** Associations with overall Patient Health Questionnaire-9 score with loneliness treated as a continuous variable.

| Effect     | Estimate | SE    | 95% CI |      | p      |
|------------|----------|-------|--------|------|--------|
|            |          |       | LL     | UL   |        |
| Intercept  | 3.69     | 0.388 | 2.93   | 4.45 | <0.001 |
| Gender (f) | 0.81     | 0.217 | 0.38   | 1.23 | <0.001 |
| Age        | -0.00    | 0.009 | -0.02  | 0.02 | 0.792  |
| Children   | 0.47     | 0.230 | 0.02   | 0.92 | 0.040  |
| Sleep (h)  | -0.02    | 0.017 | -0.06  | 0.01 | 0.157  |
| Loneliness | 3.84     | 0.145 | 3.56   | 4.13 | <0.001 |

Values are unstandardized beta coefficients with standard error (SE) and 95% confidence interval (CI); f, female; h, hours; F-statistic: 149.1 on 5 and 2001 DF, p-value: < 0.001; Adjusted R2 overall = 0.270; adjusted R2 change due to Loneliness = 0.261.

**Table S2.** Association of PHQ-2 (Feeling down, depressed, or hopeless) with loneliness.

| Effect               | Estimate | SE    | 95% CI |      | p      |
|----------------------|----------|-------|--------|------|--------|
|                      |          |       | LL     | UL   |        |
| Intercept            | -0.03    | 0.050 | -0.13  | 0.07 | 0.558  |
| Gender (f)           | -0.01    | 0.027 | -0.07  | 0.04 | 0.594  |
| Age                  | -0.00    | 0.001 | -0.00  | 0.00 | 0.444  |
| Children             | 0.02     | 0.028 | -0.03  | 0.08 | 0.415  |
| Sleep (h)            | -0.00    | 0.002 | -0.00  | 0.00 | 0.739  |
| PHQ_1                | 0.28     | 0.019 | 0.24   | 0.31 | <0.001 |
| PHQ_3                | 0.04     | 0.015 | 0.01   | 0.07 | 0.006  |
| PHQ_4                | 0.10     | 0.018 | 0.07   | 0.14 | <0.001 |
| PHQ_5                | 0.04     | 0.017 | 0.00   | 0.07 | 0.031  |
| PHQ_6                | 0.17     | 0.017 | 0.14   | 0.20 | <0.001 |
| PHQ_7                | 0.02     | 0.017 | -0.01  | 0.05 | 0.240  |
| PHQ_8                | 0.01     | 0.024 | -0.04  | 0.06 | 0.696  |
| PHQ_9                | 0.35     | 0.035 | 0.28   | 0.41 | <0.001 |
| L_some <sup>a</sup>  | 0.20     | 0.028 | 0.15   | 0.26 | <0.001 |
| L_often <sup>b</sup> | 0.49     | 0.044 | 0.40   | 0.57 | <0.001 |

Values are unstandardized beta coefficients with standard error (SE) and 95% confidence interval (CI); f, female; h, hours; loneliness treated as a continuous variable; <sup>a</sup>L\_some = Dummy variable encoding loneliness "sometimes" as 1, "never" or "often" as 0; <sup>b</sup>L\_often = Dummy variable encoding loneliness "often" as 1, "never" or "some-times" as 0; F-statistic: 191.5 on 12 and 1994 DF, p-value: < 0.001; Adjusted R2 overall = 0.53.

**Table S3.** Association of age and age<sup>2</sup> with loneliness.

| Effect           | Estimate | SE    | 95% CI |       | p      |
|------------------|----------|-------|--------|-------|--------|
|                  |          |       | LL     | UL    |        |
| Intercept        | 1.17     | 0.164 | 0.85   | 1.49  | <0.001 |
| Gender (f)       | 0.06     | 0.033 | 0.00   | 0.13  | 0.062  |
| Age              | -0.03    | 0.009 | -0.04  | -0.01 | 0.005  |
| Age <sup>2</sup> | -0.00    | 0.000 | 0.00   | 0.00  | 0.043  |
| Children         | -0.08    | 0.037 | -0.15  | -0.01 | 0.025  |
| Sleep (h)        | -0.00    | 0.003 | -0.01  | 0.00  | 0.107  |

Values are unstandardized beta coefficients with standard error (SE) and 95% confidence interval (CI); f, female; h, hours; loneliness treated as a continuous variable; F-statistic: 11.72 on 5 and 2001 DF, p-value: < 0.001; Adjusted R2 overall = 0.03.

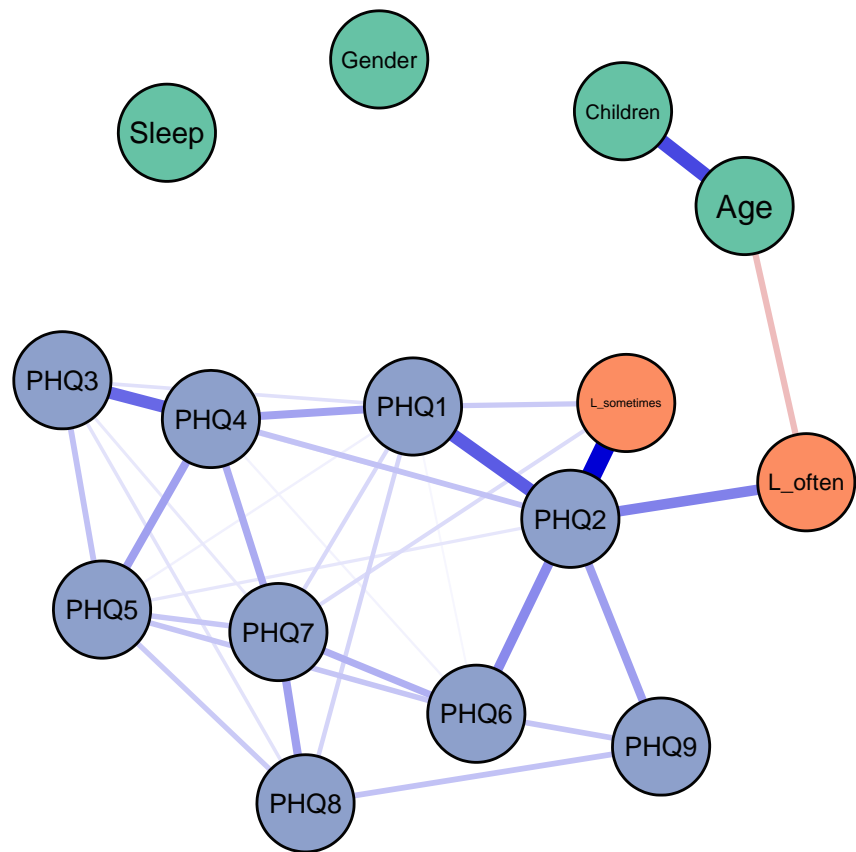

**Figure 1.** Visualization of Figure 1 using the Fruchterman-Reingold algorithm.

Relationships between PHQ-9 items, demographics and loneliness. Green: Demographics; Orange: Loneliness; Blue: PHQ; The edge between L\_sometimes and L\_often was excluded. L\_sometimes = Dummy variable encoding loneliness “sometimes” as 1, “never” or “often” as 0; L\_often = Dummy variable encoding loneliness “often” as 1, “never” or “sometimes” as 0; Children = living with children in the same household; Sleep = average hours of sleep per night in the previous 7 days; Patient Health Questionnaire (PHQ)-1 = Little interest or pleasure in doing things; PHQ-2 = Feeling down, depressed, or hopeless, ; PHQ-3 = Trouble falling or staying asleep, or sleeping too much; PHQ-4 = Feeling tired or having little energy; PHQ-5 = Poor appetite or overeating; PHQ-6 = Feeling bad about yourself – or that you are a failure or have let yourself or your family down; PHQ-7 = Trouble concentrating on things, such as reading the newspaper or watching television; PHQ-8 = Moving or speaking so slowly that other people could have noticed. Or the opposite – being so figety or restless that you have been moving around a lot more than usual; PHQ-9 = Thoughts that you would be better off dead, or of hurting yourself.

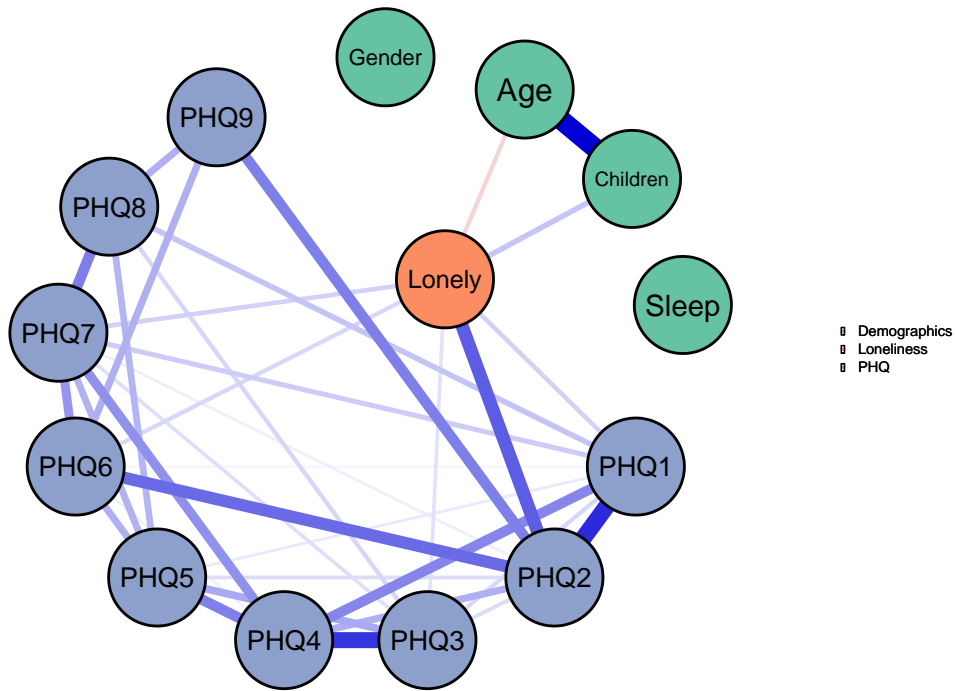

**Figure S2.** Relationships between Patient Health Questionnaire-9 items, demographics and loneliness treated as a continuous variable.

Children = living with children in the same household; Sleep = average hours of sleep per night in the previous 7 days; Patient Health Questionnaire (PHQ)-1 = Little interest or pleasure in doing things; PHQ-2 = Feeling down, depressed, or hopeless, ; PHQ-3 = Trouble falling or staying asleep, or sleeping too much; PHQ-4 = Feeling tired or having little energy; PHQ-5 = Poor appetite or overeating; PHQ-6 = Feeling bad about yourself – or that you are a failure or have let yourself or your family down; PHQ-7 = Trouble concentrating on things, such as reading the newspaper or watching television; PHQ-8 = Moving or speaking so slowly that other people could have noticed. Or the opposite – being so figety or restless that you have been moving around a lot more than usual; PHQ-9 = Thoughts that you would be better off dead, or of hurting yourself.

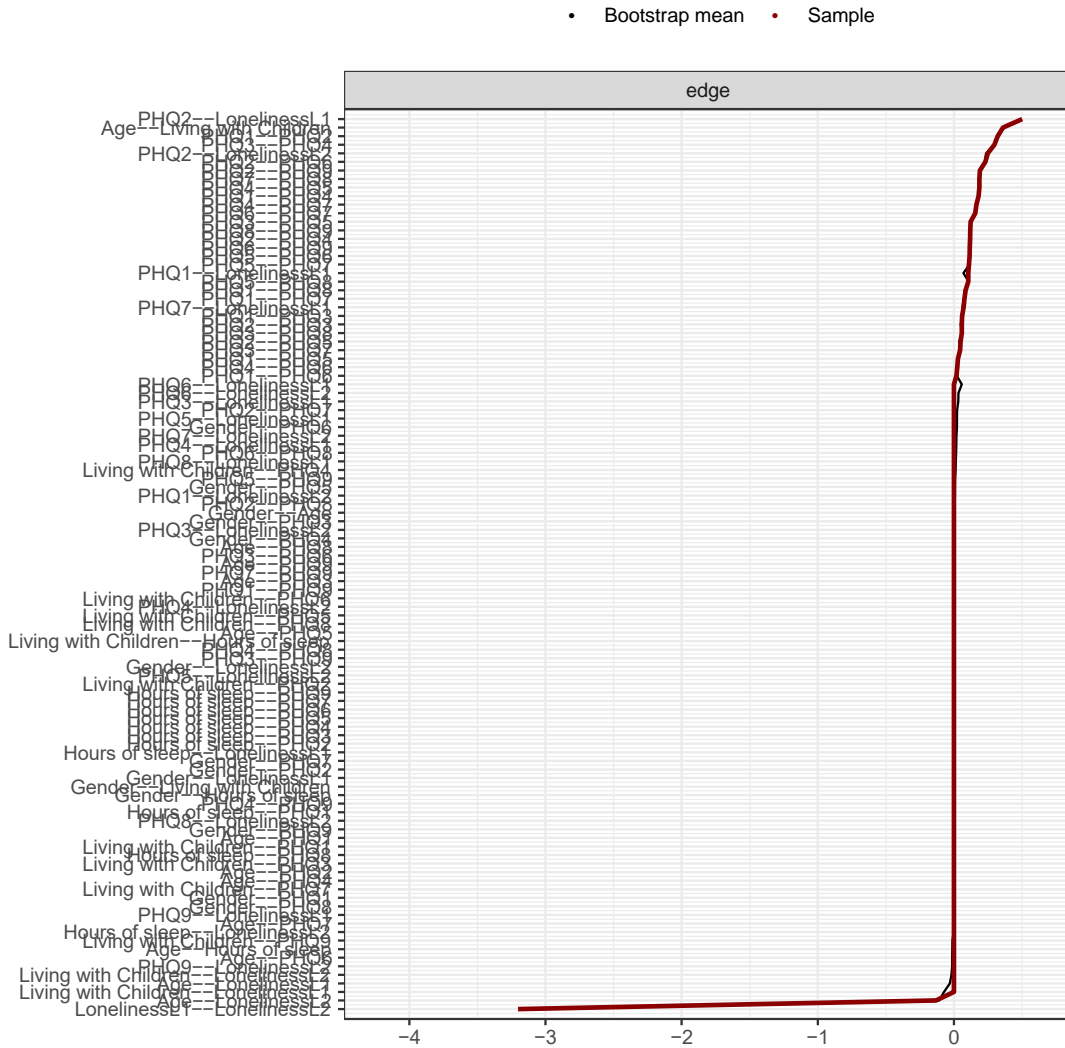

**Figure S3.** Bootstrap 95% confidence intervals of the edge weights of the network shown in Figure 1.

Loneliness represented by dummy variables. A horizontal line represents an individual edge. The red line indicates an individual edge's weight. The grey area represents the 95% confidence interval. L\_sometimes = Dummy variable encoding loneliness "sometimes" as 1, "never" or "often" as 0; L\_often = Dummy variable encoding loneliness "often" as 1, "never" or "sometimes" as 0; Children = living with children in the same household; Sleep = average hours of sleep per night in the previous 7 days; Patient Health Questionnaire (PHQ)-1 = Little interest or pleasure in doing things; PHQ-2 = Feeling down, depressed, or hopeless; ; PHQ-3 = Trouble falling or staying asleep, or sleeping too much; PHQ-4 = Feeling tired or having little energy; PHQ-5 = Poor appetite or overeating; PHQ-6 = Feeling bad about yourself – or that you are a failure or have let yourself or your family down; PHQ-7 = Trouble concentrating on things, such as reading the newspaper or watching television; PHQ-8 = Moving or speaking so slowly that other people could have noticed. Or the opposite – being so fidgety or restless that you have been moving around a lot more than usual; PHQ-9 = Thoughts that you would be better off dead, or of hurting yourself.
